# Supplementary material for: Investigation of Renal Function in Patients with Long COVID in the Amazon Region: A Cross-Sectional Study
Source: Preprints.org preprint supplement (doi:10.20944/preprints202306.1854.v1), 2023-06-27
Supplement: Supplementary file 1 [file supplementary]

**Appendix B**

**Table S1.** Reference range (adult men and women) of laboratory parameters

| **Exam** | **Min** | **Max** | **Measure** |
| --- | --- | --- | --- |
| Haemoglobin | 13,5 | 18,0 | g/dl |
| Haematocrit | 40,0 | 54,0 | % |
| Leukocytes | 5,000 | 10,000 | mm |
| Erythrocyte Sedimentation rate (ESR) | 0 | 20 | mm |
| Prothrombin Time (PT) | 70 | 180 | % |
| Activated Partial Thromboplastin (APTT) | 24 | 39 | seconds |
| Glycated Haemoglobin | 4,8 | 5,9 | % |
| C-Reactive Protein * | Negative | Positive |  |
| Glucose | 65 | 99 | mg/dl |
| Total Cholesterol | - | 200 | mg/dl |
| HDL | 60 | - | mg/dl |
| LDL | - | 100 | mg/dl |
| Triglycerides | - | 150 | mg/dl |
| TGO | - | 38 | U/L |
| TGP | - | 41 | U/L |
| Alkaline Phosphatase | 65 | 300 | U/L |
| Gamma GT | 11 | 50 | U/L |
| Urea | 15 | 45 | mg/dl |
| Creatinine | 0,4 | 1,3 | mg/dl |
| Calcium | 8,5 | 10,5 | mg/dl |
| Iron | 65 | 175 | ug/dL |
| Ferritin | 50 | 300 | mg |
| Potassium | 3,5 | 5,5 | mEq/L |
| Sodium | 134 | 149 | mEq/L |
| Creatine phosphokinase (CPK) | - | 195 | U/L |
| Creatine phosphokinase MB | - | 25 | U/L |
| Lactic dehydrogenase(LDH) | 230 | 460 | U/L |
| Albumin | 3,5 | 4,8 | g/dL |
| Leukocytes urine | - | 4 | field |
| Red blood cells urine | - | 2 | field |
| Proteins urine | - | - | field |

Min, minimum; Max, maximum; HDL, mean high density lipoproteins; LDL, mean low density lipoproteins; TGO, mean oxaloacetic transaminase; TGP, mean pyruvic transaminase.

*Qualitative sample; negative referene value

*Laboratory test values are influenced by physiological states and medication use, including diet or fasting time
